# Supplementary material for: The Preventive Effect of Specific Collagen Peptides against Dexamethasone-Induced Muscle Atrophy in Mice
Source: MDPI journal article supplement (doi:10.3390/molecules28041950), 2023-02-18
Supplement: s1 [file s1]

Supplementary table S1. Amino acid composition of CP.

| <b>Amino acid</b> | <b>Weight (%)*</b> |
|-------------------|--------------------|
| Glycine           | 22.1               |
| Proline           | 12.3               |
| Alanine           | 8.5                |
| Hydroxylproline   | 11.3               |
| Glutamic acid     | 10.1               |
| Arginine          | 7.8                |
| Aspartic acid     | 5.8                |
| Serine            | 3.2                |
| Lysine            | 3.8                |
| Leucine           | 2.7                |
| Valine            | 2.4                |
| Threonine         | 1.8                |
| Phenylalanine     | 2.1                |
| Hydroxylysine     | 1.7                |
| Isoleucine        | 1.3                |
| Methionine        | 0.9                |
| Histidine         | 1.2                |
| Tyrosine          | 0.9                |

\* weight % of each amino acid in CP.
